# Supplementary material for: Directing osteoblastic cell migration on arrays of nanopillars and nanoholes with different aspect ratios
Source: Royal Society of Chemistry journal article supplement (doi:10.1039/d1lc00104c), 2021-01-01
Supplement: d1lc00104c1.pdf [file d1lc00104c1.pdf]

*Electronic Supplementary Information (ESI)*

# **Directing Osteoblastic Cell Migration on Arrays of Nanopillars and Nanoholes with Different Aspect Ratios**

*Y. J. Cheng,<sup>‡</sup> S. Y. Zhu,<sup>‡</sup> and S. W. Pang<sup>\*</sup>*

Department of Electrical Engineering, City University of Hong Kong, Kowloon, Hong Kong

Centre for Biosystems, Neuroscience, and Nanotechnology, City University of Hong Kong,  
Kowloon, Hong Kong

<sup>‡</sup> These authors contributed equally to the work

<sup>\*</sup> Corresponding Authors: pang@cityu.edu.hk

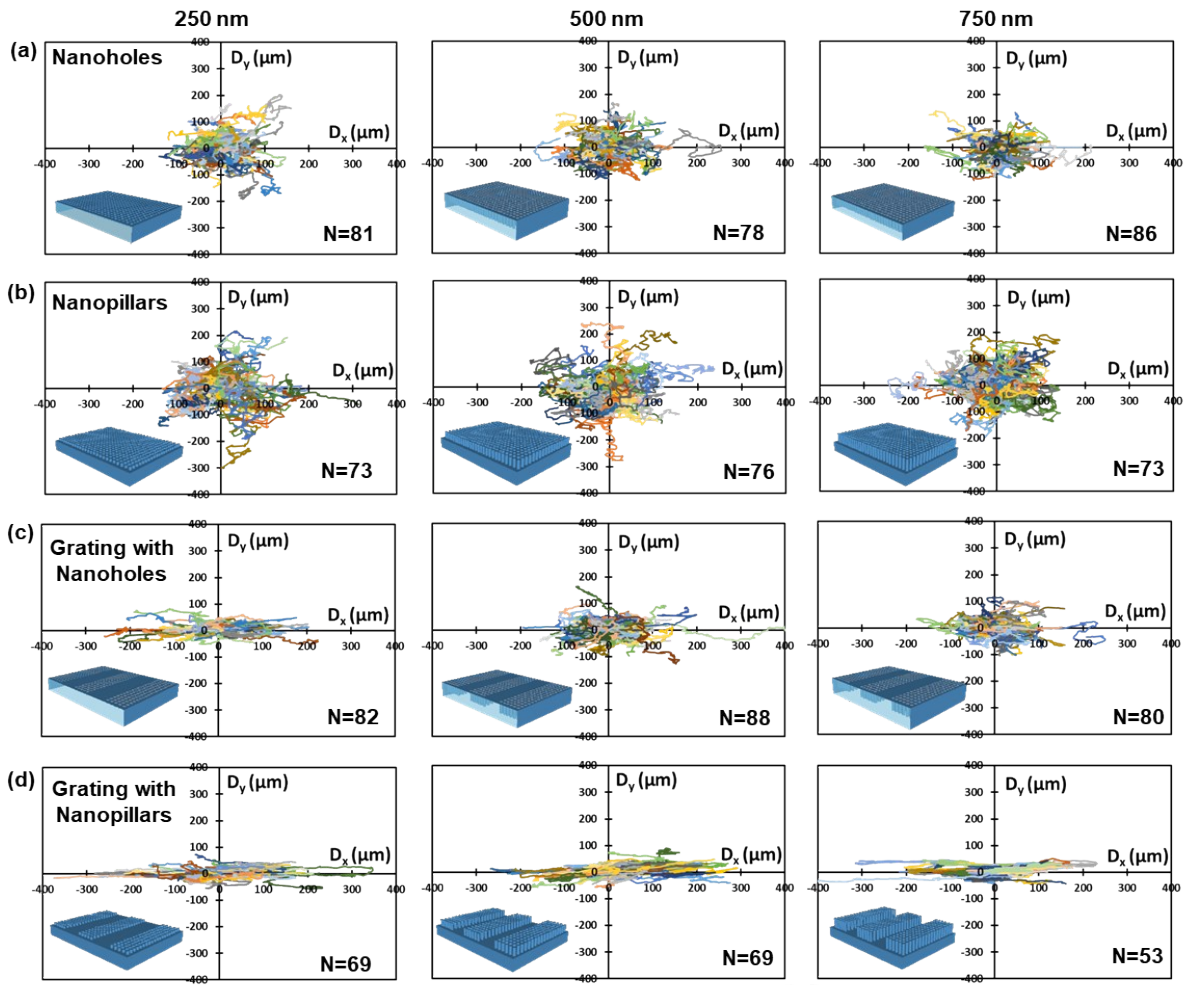

**Supplementary Figure S1.** Cell migration on (a) nanoholes, (b) nanopillars, (c) grating with nanoholes, and (d) grating with nanopillars with 250, 500, and 750 nm depth/height.

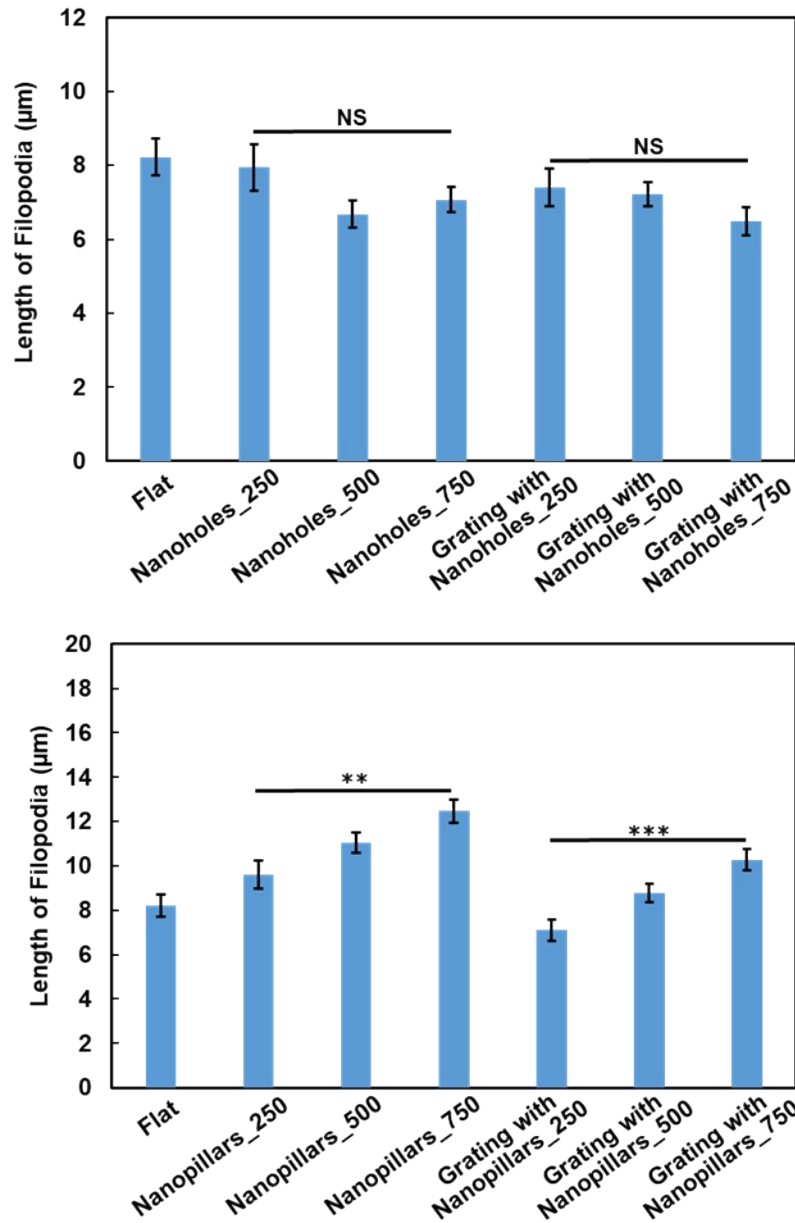

**Supplementary Figure S2.** Length of filopodia on platforms with nanoholes and nanopillars with 250, 500, and 750 nm height (One Way ANOVA with Tukey's post-hoc test, \*\*p <0.01, \*\*\*p <0.001, NS - not significant).

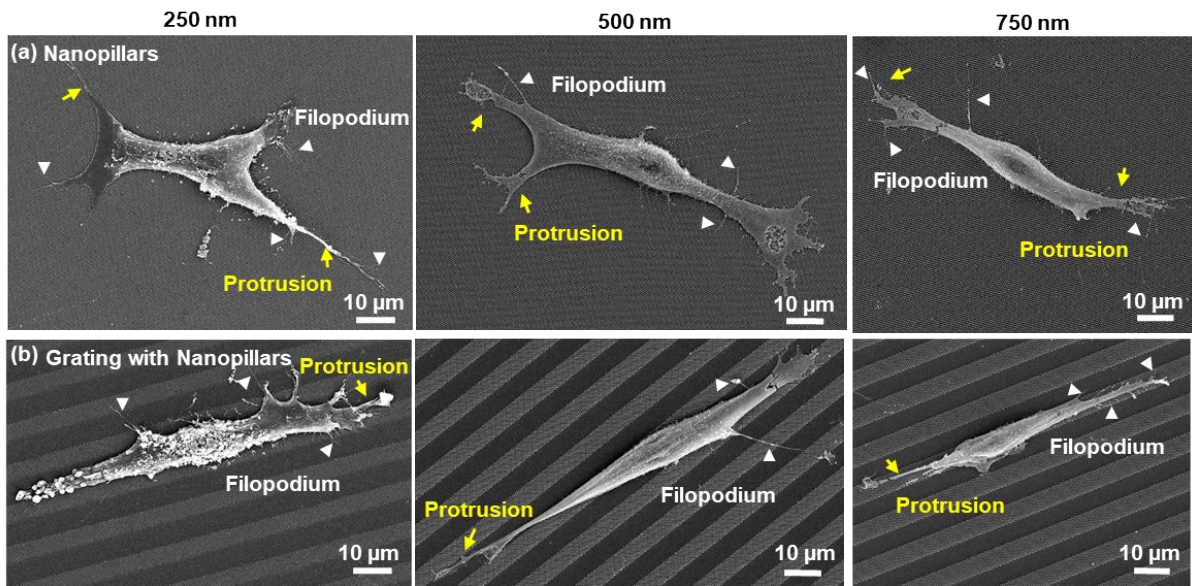

**Supplementary Figure S3.** Micrographs of MC3T3 cells on (a) nanopillars and (b) grating with nanopillars with 250, 500, and 750 nm height.
